# Supplementary material
Source: publisher site journal article supplement (https://www.dovepress.com/article/385269)
Supplement: Supplementary file 1 [file get_supplementary_file.php]

Photothermal Nanoheaters-Modified Spores for Safe and Controllable Antitumor Therapy

Xin Zhang1#, Yang Zhang2#, Ning Wang1, Ye-Tong Shen1, Qing Chen2, Lu Han1, Bo Hu1*

1 Department of Biochemistry and Molecular Biology, School of Life Sciences, China Medical University, Shenyang 110122, China

2 School of pharmacy, Shenyang Medical College, Shenyang 110034, China

*Corresponding authors. *E-mail address:* [bhu@cmu.edu.cn](mailto:bhu@cmu.edu.cn), 86hubo86@163.com (B. Hu)

# Xin Zhang and Yang Zhang contributed equally to this work.

**Supporting Figures**


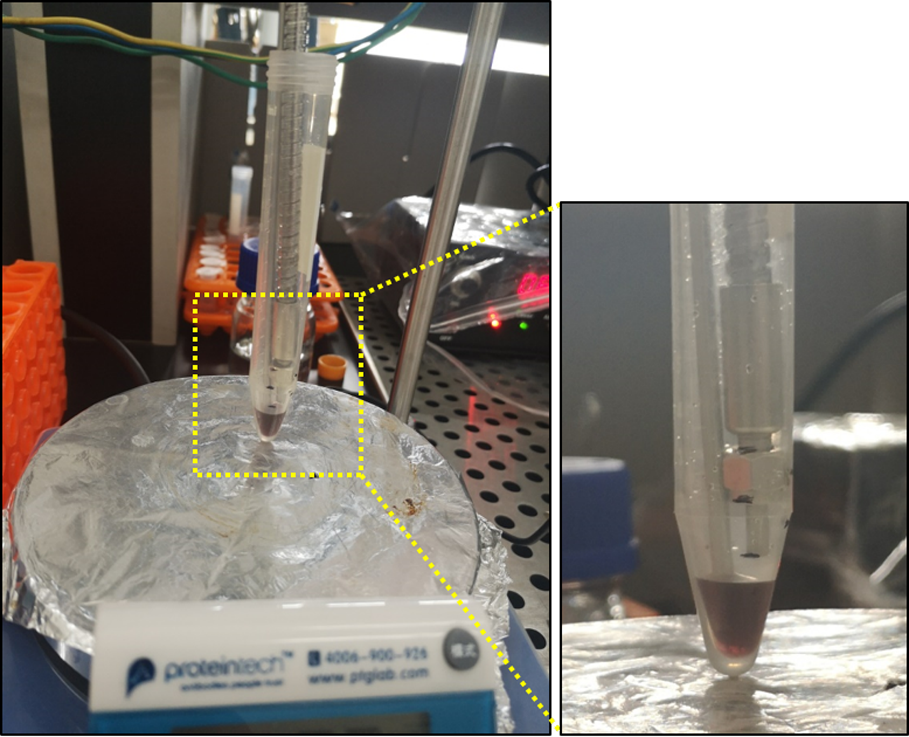


**Figure S1**. Device diagram for photothermal conversional performance study. (808 nm laser)


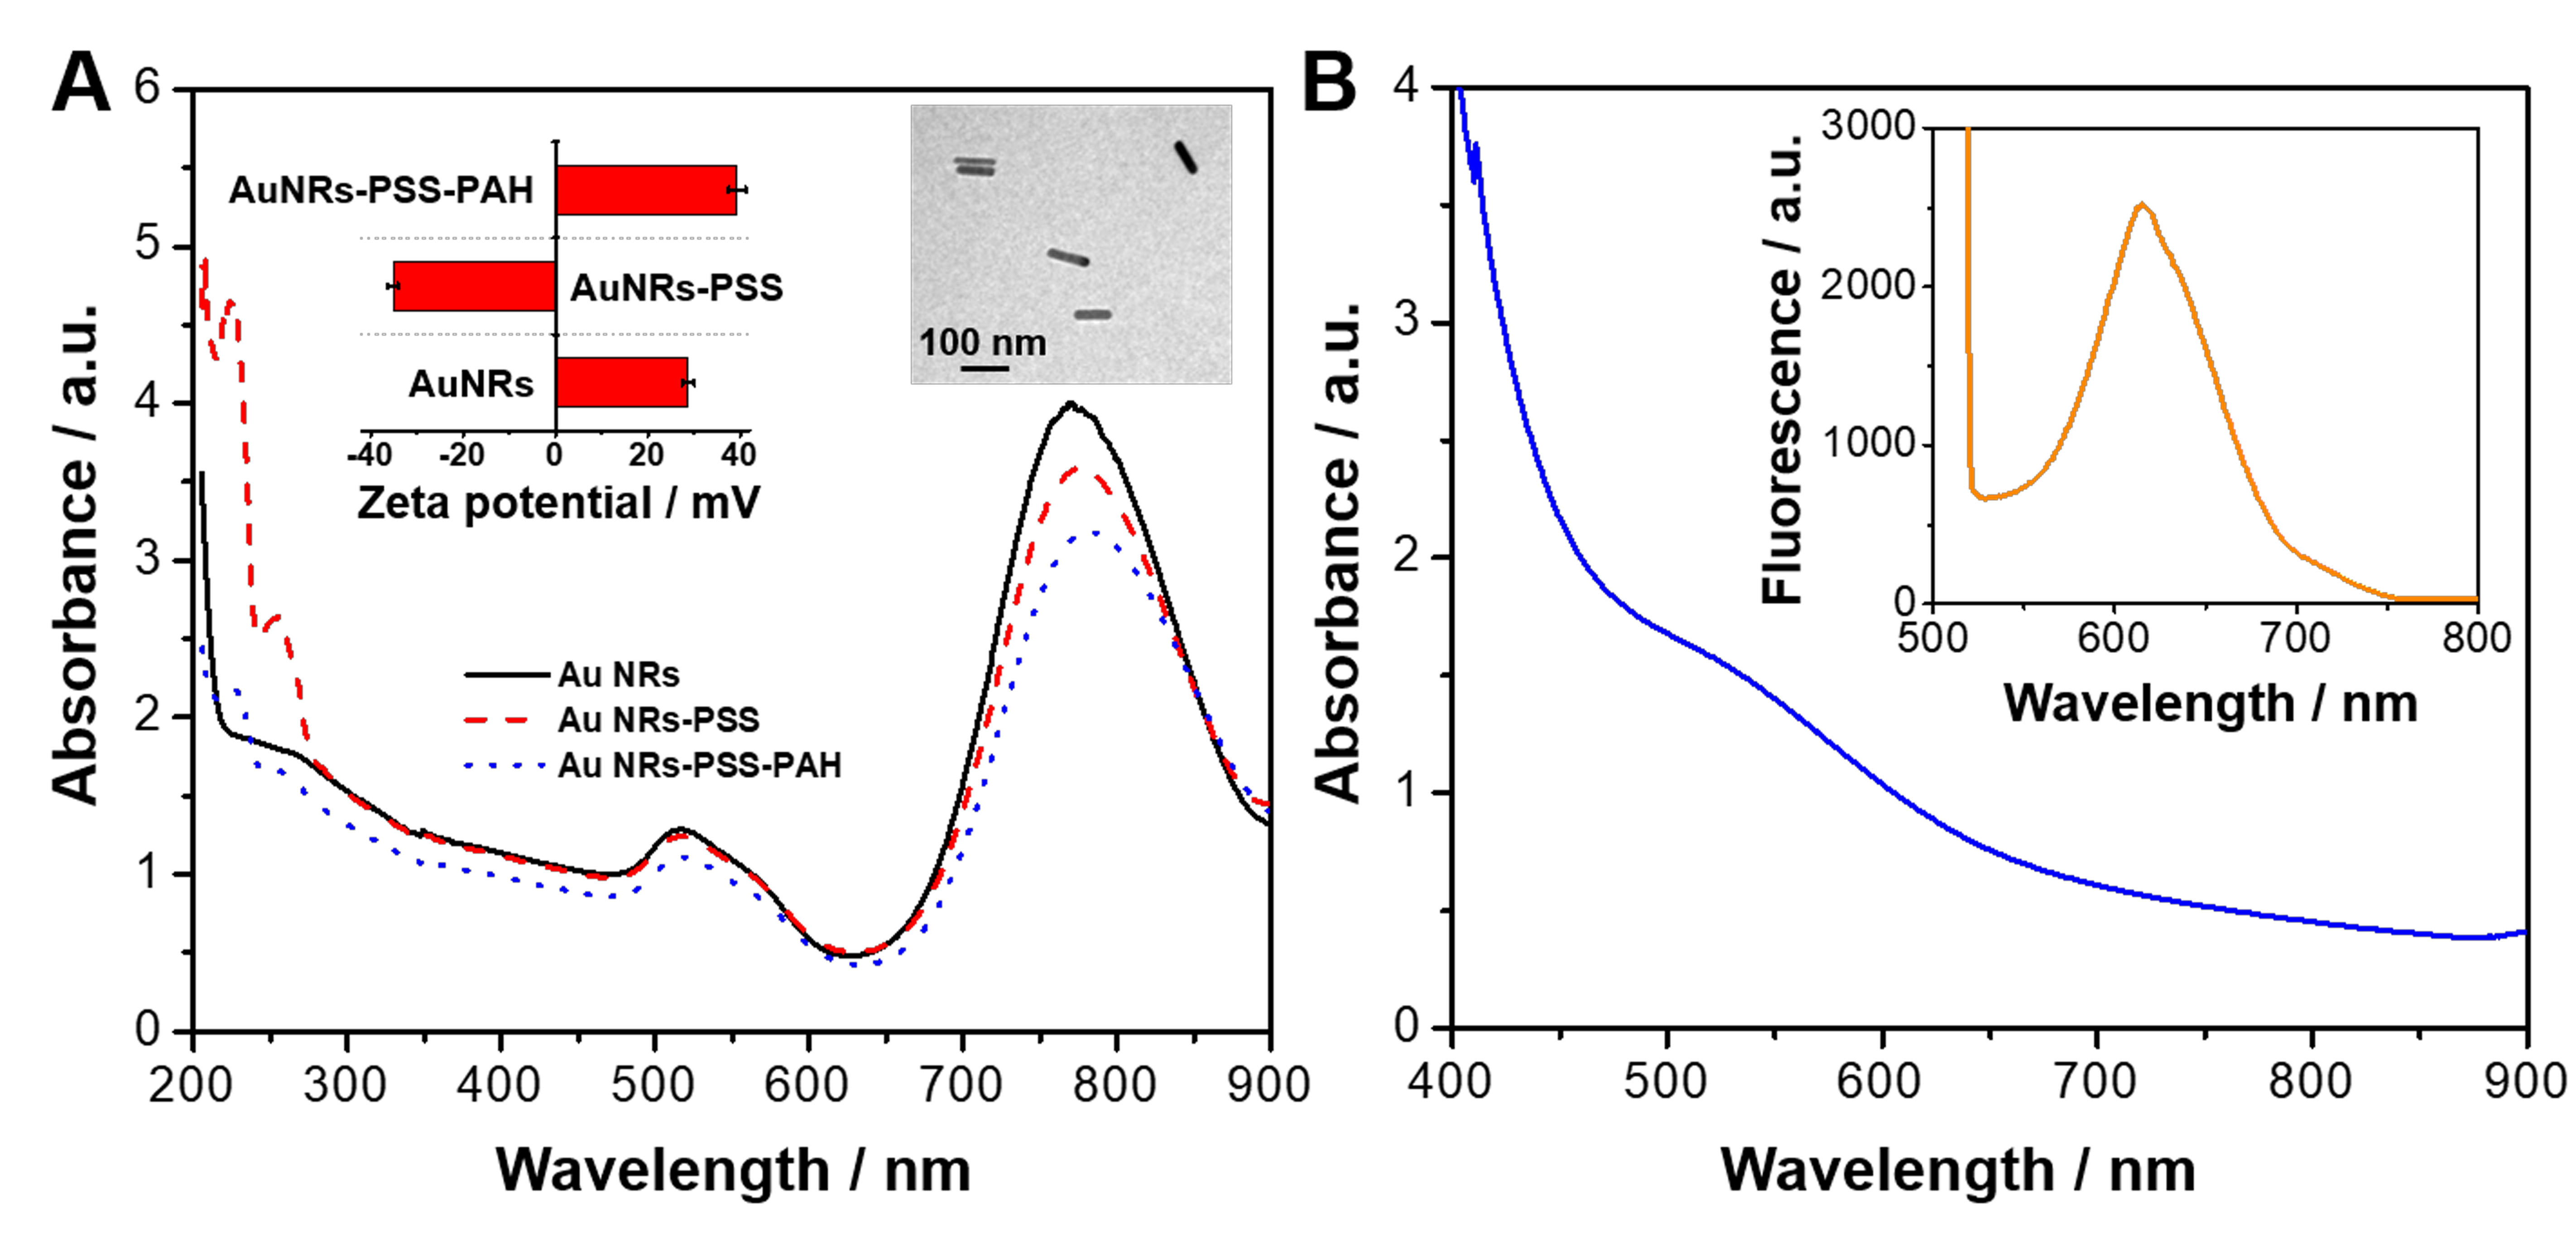


**Figure S2**. (A) Absorption spectra, zeta potential (inset, left) and TEM images (inset, right) of AuNRs, AuNRs-PSS and AuNRs-PSS-PAH. (B) Absorption and fluorescence emission spectra (inset) of BSA-AuNCs.


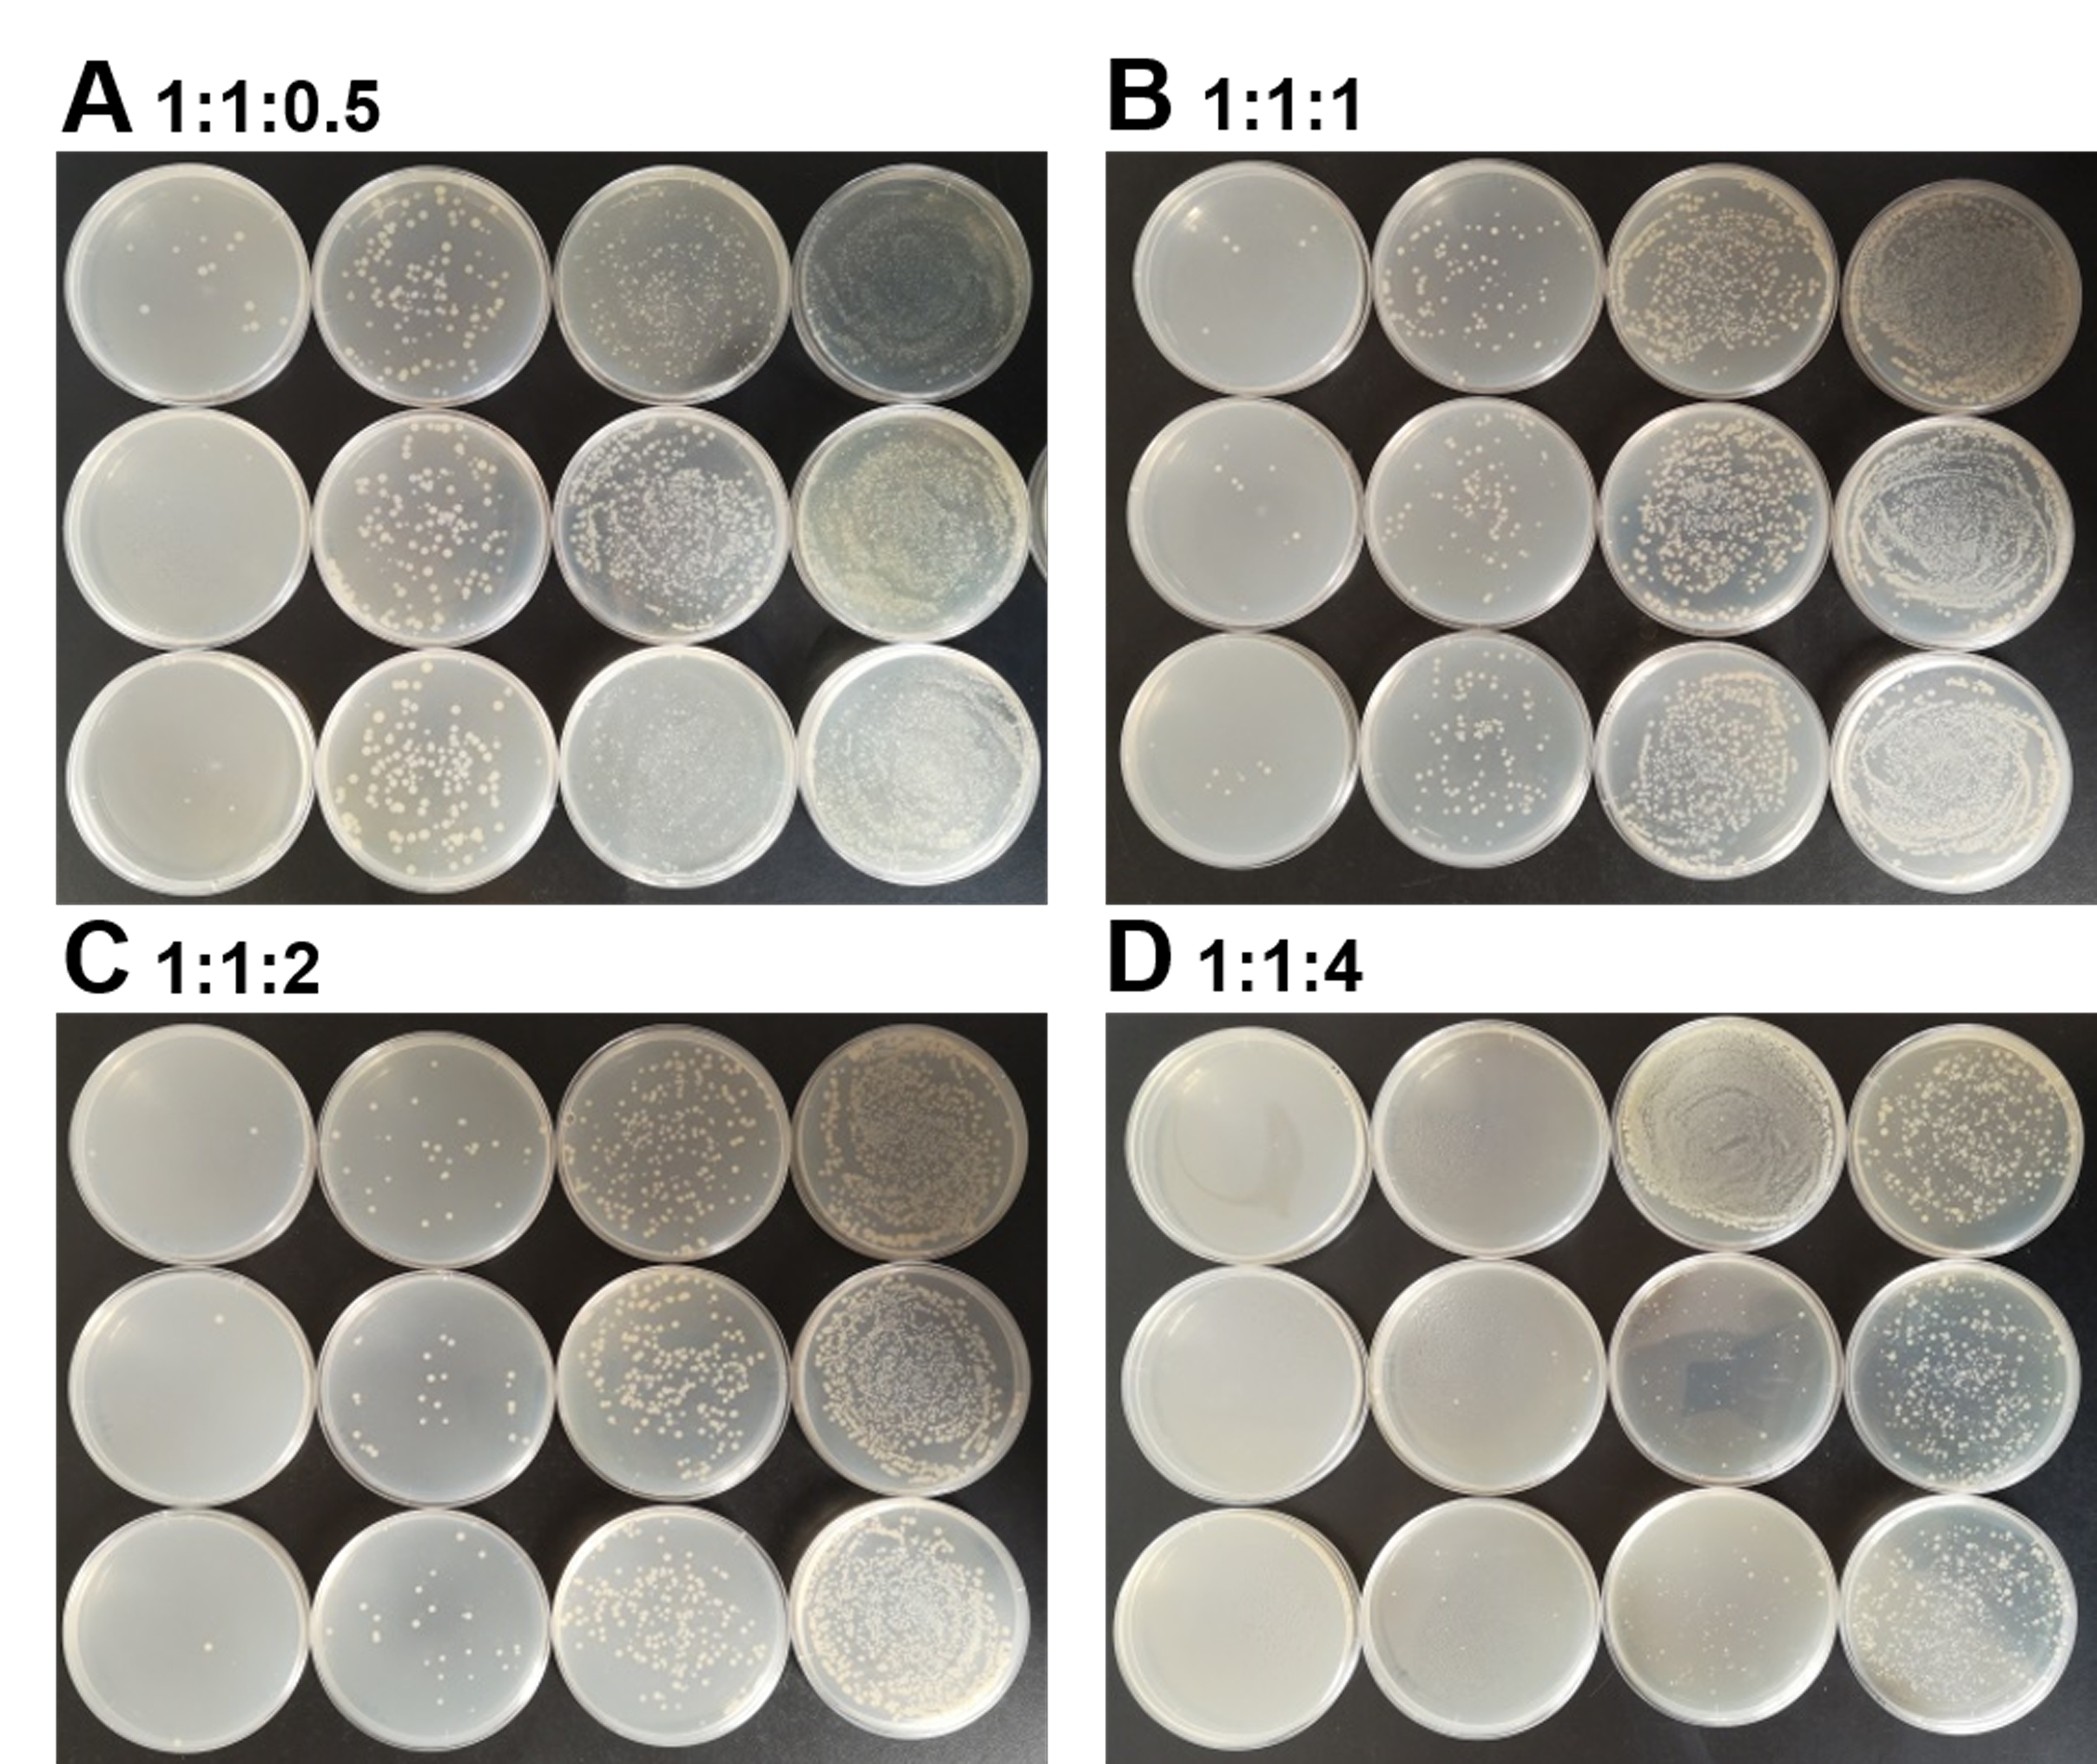


**Figure S3**. The antibacterial properties of Spore@NRs/NCs at different Spore:NCs:NRs ratio. (NIR irradiation: 808 nm, 900 mW, 20 min)


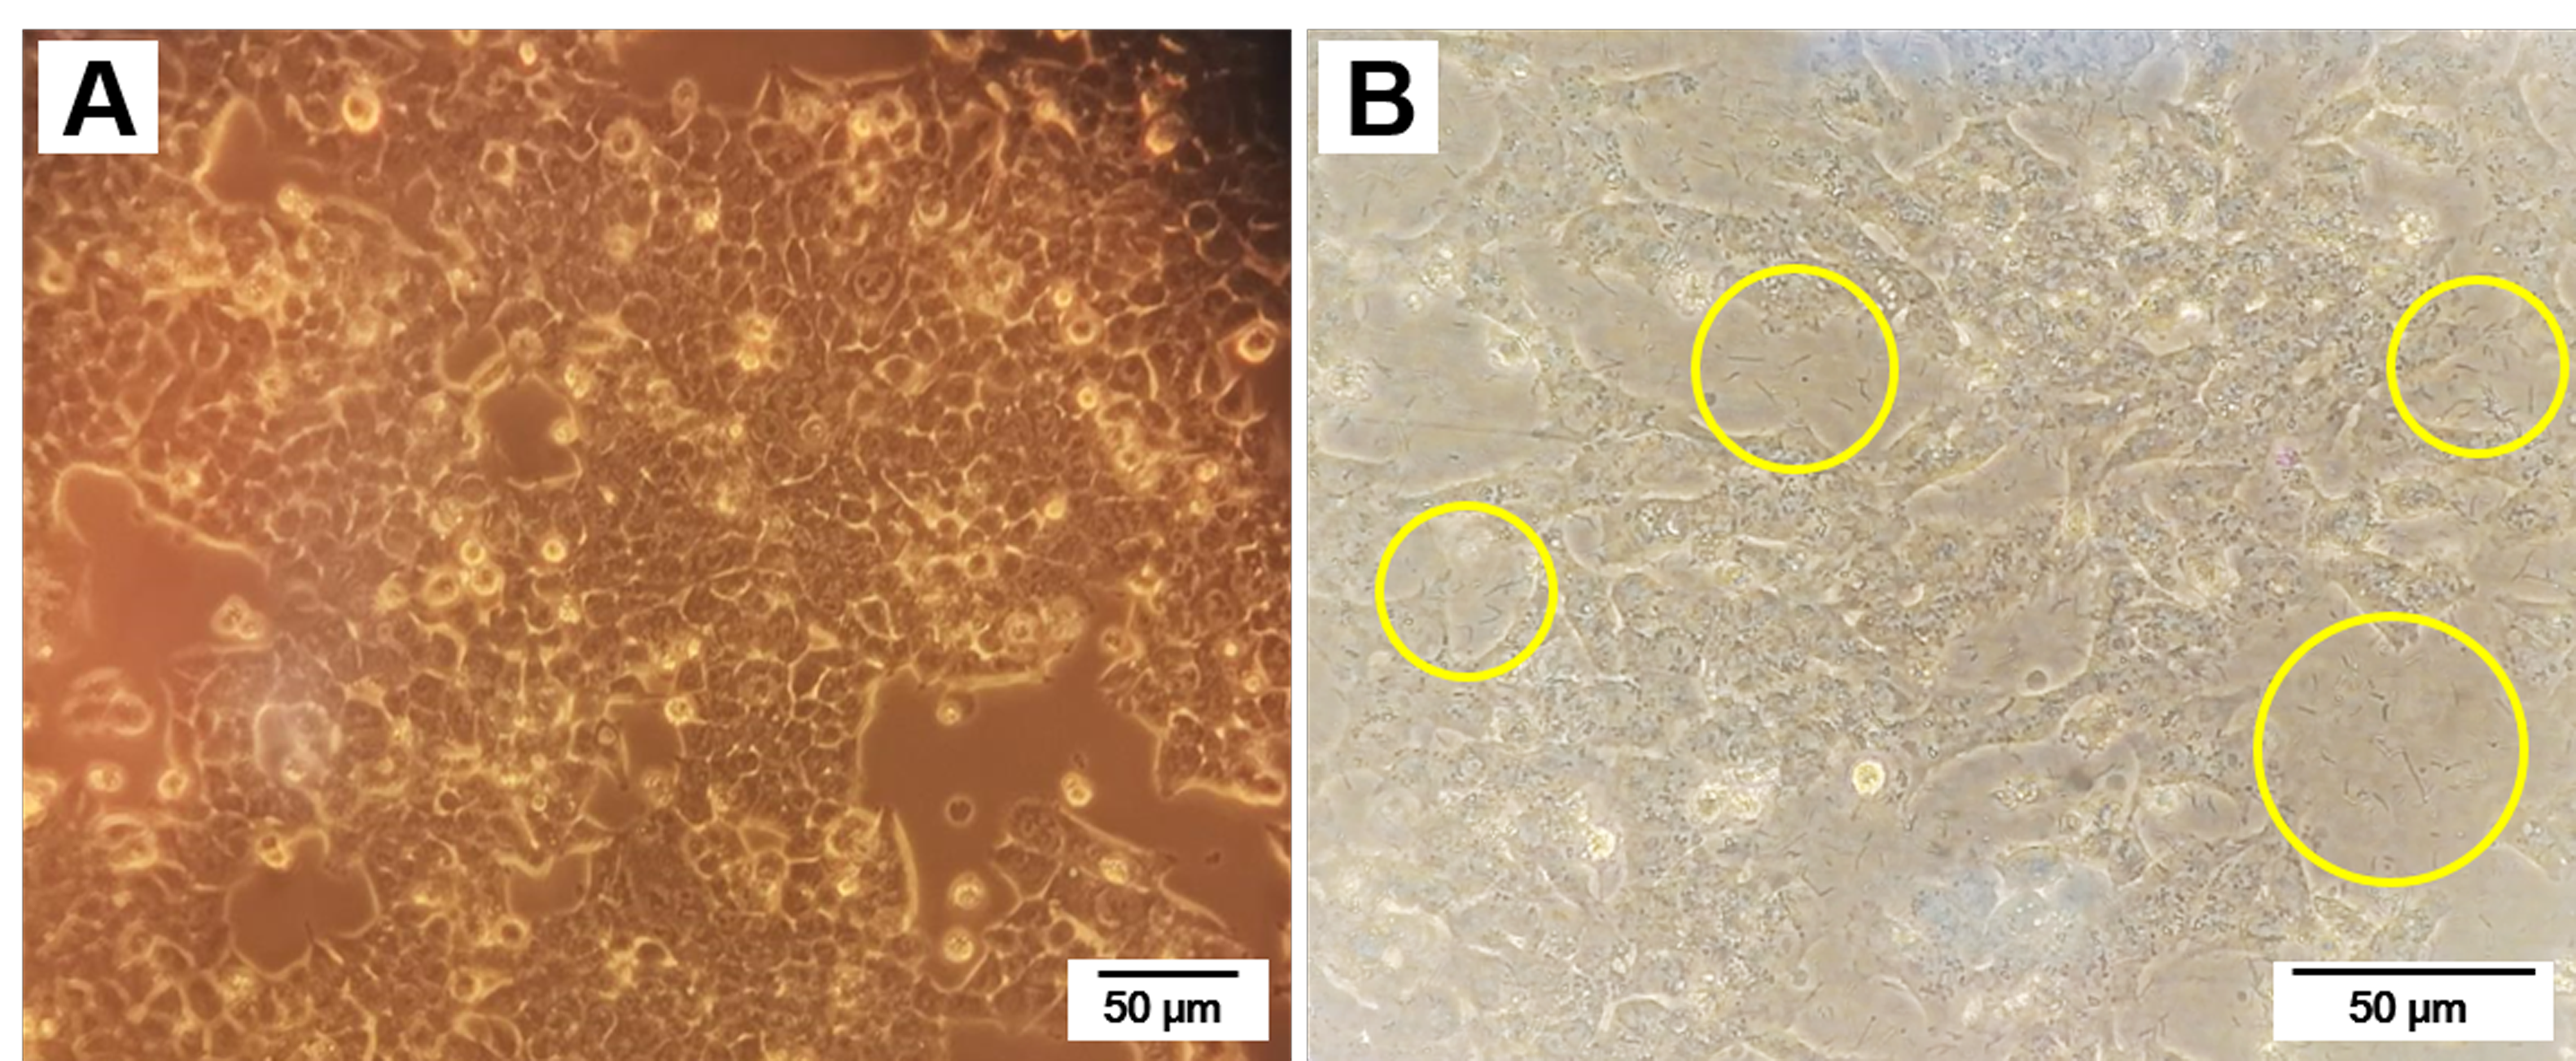


**Figure S4**. Bright field confocal images ofHCT116 cells (A) and HCT116 cells deal with Spore@NRs/NCs (B) (Yellow circles indicate the extracellular vegetative/activated bacteria cell@NRs/NCs).

This information is available free of charge via the Internet at [http://](http://pubs.acs.org/)****
